# Supplementary material
Source: publisher figshare collection journal article supplement (https://acs.figshare.com/ndownloader/files/4615852)
Supplement: Supplementary file 1 [file 4615852]

# **Bangladesh and Vietnam: Different groundwater compositions require different approaches to arsenic mitigation**

Stephan J. Hug\*, Olivier X. Leupin and Michael Berg

Eawag, Swiss Federal Institute of Aquatic Science and Technology, Ueberlandstrasse 133,  
8600 Dübendorf, Switzerland

\* corresponding author: [stephan.hug@eawag.ch](mailto:stephan.hug@eawag.ch)

## **Supporting Information**

- |    |                                                                                                |       |
|----|------------------------------------------------------------------------------------------------|-------|
| 1. | Table S1: Vital statistics of Bangladesh and Vietnam                                           | S2    |
| 2. | Table S2: Arsenic, iron and phosphate concentrations and ratios in all districts of Bangladesh | S3-S4 |
| 3. | Figure S1: Map of districts with arsenic concentrations                                        | S5    |

**Table S1.** Overview of key data of Bangladesh and Vietnam. Sources: The world fact book of the CIA (<http://www.cia.gov/cia/publications/factbook/>) and (<http://www.nationmaster.com/>)

|                                                                  | <b>Bangladesh</b>                                                                     | <b>Vietnam</b>                                                                        |
|------------------------------------------------------------------|---------------------------------------------------------------------------------------|---------------------------------------------------------------------------------------|
| <b>Area</b>                                                      | total: 144,000 sq km<br>land: 133,910 sq km<br>water: 10,090 sq km                    | total: 329,560 sq km<br>land: 325,360 sq km<br>water: 4,200 sq km                     |
| <b>Land use</b>                                                  | arable land: 55.39%<br>permanent crops: 3.08%<br>other: 41.53% (2005)                 | arable land: 20.14%<br>permanent crops: 6.93%<br>other: 72.93% (2005)                 |
| <b>Irrigated Land</b>                                            | 47,250 sq km (2003)                                                                   | 30,000 sq km (2003)                                                                   |
| <b>Fertilizer used (kg per ha)**</b>                             | 156.3                                                                                 | 285.3                                                                                 |
| <b>Population</b>                                                | 147,365,352                                                                           | 84,402,966                                                                            |
| <b>Population growth rate</b>                                    | 2.09% (2006 est.)                                                                     | 1.02% (2006 est.)                                                                     |
| <b>Life expectancy at birth</b>                                  | total population: 62.46 years<br>male: 62.47 years<br>female: 62.45 years (2006 est.) | total population: 70.85 years<br>male: 68.05 years<br>female: 73.85 years (2006 est.) |
| <b>Literacy (definition: age 15 and over can read and write)</b> | total population: 43.1%<br>male: 53.9% female: 31.8% (2003 est.)                      | total population: 90.3%<br>male: 93.9%<br>female: 86.9% (2002)                        |
| <b>GDP (purchasing power parity):</b>                            | \$304.3 billion (2005 est.)                                                           | \$232.2 billion (2005 est.)                                                           |
| <b>GDP - real growth rate:</b>                                   | 5.7% (2005 est.)                                                                      | 8.4% (2005 est.)                                                                      |
| <b>GDP - per capita (PPP):</b>                                   | \$2,100 (2005 est.)                                                                   | \$2,800 (2005 est.)                                                                   |
| <b>Unemployment rate</b>                                         | 2.5% (includes underemployment) (2005 est.)                                           | 5.5% (2005 est.)                                                                      |
| <b>Population below poverty line:</b>                            | 45% (2004 est.)                                                                       | 19.5% (2004 est.)                                                                     |

The exact number of people with arsenic related diseases is still an issue of intense debate. Yu et al. (S1) estimated that long-term exposure to arsenic in Bangladesh would result in approximately 1,200,000 cases of hyperpigmentation, 600,000 cases of keratosis, 125,000 cases of skin cancer, and 3000 fatalities per year from internal cancers. Exposure to arsenic was also shown to adversely affect the mental development of children (S2).

Table S2. Concentrations and relevant numbers for arsenic removal in Bangladesh

| District                 | As (µg/L)<br>(mean±std) | Fe (mg/L)<br>(mean±std) | P (mg/L)<br>(mean±std) | (Fe-<br>1.8P)<br>(M/M) | As<br>>50 µg/L | As>50<br>µg/L<br>(%) | As<br>removal<br>OK | As<br>removal<br>OK (%) | Popula-<br>tion<br>(Mio) |
|--------------------------|-------------------------|-------------------------|------------------------|------------------------|----------------|----------------------|---------------------|-------------------------|--------------------------|
| Bagerhat *               | 175±172                 | 6.78±5.33               | 1.42±0.90              | 17                     | 37/55          | 67%                  | 17/55               | 31%                     | 1.516                    |
| Barguna                  | 5±6                     | 1.18±1.00               | 5.37±1.45              | -4668                  | 0/3            | 0%                   | 0/3                 | 0%                      | 0.838                    |
| Barisal *                | 189±202                 | 4.08±3.31               | 2.11±2.21              | -19                    | 26/40          | 65%                  | 4/40                | 10%                     | 2.331                    |
| Bhola **                 | 201±54                  | 4.45±4.57               | 1.10±0.28              | 6                      | 2/2            | 100%                 | 0/2                 | 0%                      | 1.677                    |
| Bogra                    | 18±70                   | 3.13±6.66               | 0.26±0.61              | 168                    | 8/90           | 9%                   | 48/90               | 53%                     | 2.989                    |
| Brahamanbaria            | 103±159                 | 3.31±4.89               | 0.98±1.31              | 2                      | 21/52          | 40%                  | 19/52               | 37%                     | 2.989                    |
| Chandpur **              | 410±178                 | 4.45±3.29               | 2.17±1.74              | -8                     | 52/52          | 100%                 | 2/52                | 4%                      | 2.210                    |
| Chittagong               | 39±80                   | 4.80±8.81               | 2.28±4.11              | -91                    | 6/32           | 19%                  | 12/32               | 38%                     | 6.545                    |
| Chuadanga                | 82±124                  | 2.55±2.07               | 0.33±0.24              | 24                     | 13/31          | 42%                  | 11/31               | 35%                     | 0.987                    |
| Comilla *                | 150±152                 | 2.58±2.81               | 1.27±1.41              | -14                    | 68/101         | 67%                  | 18/101              | 18%                     | 4.587                    |
| Cox'sBazar <sup>g</sup>  | 4±13                    | 6.45±7.03               | 0.54±0.84              | 1541                   | 1/27           | 4%                   | 18/27               | 67%                     | 1.757                    |
| Dhaka                    | 51±71                   | 5.51±5.86               | 0.86±0.75              | 71                     | 14/36          | 39%                  | 17/36               | 47%                     | 8.576                    |
| Dinajpur                 | 3±8                     | 1.41±2.70               | 0.13±0.14              | 466                    | 2/94           | 2%                   | 42/94               | 45%                     | 2.618                    |
| Faridpur *               | 149±155                 | 4.29±3.40               | 0.92±0.76              | 12                     | 41/59          | 69%                  | 10/59               | 17%                     | 1.719                    |
| Feni                     | 62±87                   | 3.59±5.76               | 1.10±1.86              | 0                      | 16/44          | 36%                  | 19/44               | 43%                     | 1.196                    |
| Gaibandha <sup>g</sup>   | 22±87                   | 5.36±7.08               | 0.35±0.41              | 258                    | 5/67           | 7%                   | 45/67               | 67%                     | 2.118                    |
| Gazipur                  | 4±24                    | 0.51±0.90               | 0.14±0.09              | 16                     | 1/42           | 2%                   | 11/42               | 26%                     | 2.026                    |
| Gopalganj **             | 229±153                 | 6.98±4.24               | 1.46±0.85              | 13                     | 32/34          | 94%                  | 8/34                | 24%                     | 1.132                    |
| Habiganj <sup>g</sup>    | 23±47                   | 8.02±6.78               | 1.04±0.84              | 274                    | 6/56           | 11%                  | 40/56               | 71%                     | 1.757                    |
| Jaipurhat <sup>g</sup>   | 1±2                     | 1.71±3.19               | 0.07±0.06              | 1415                   | 0/40           | 0%                   | 30/40               | 75%                     | 0.845                    |
| Jamalpur                 | 15±35                   | 4.33±5.17               | 0.37±0.40              | 285                    | 4/61           | 7%                   | 39/61               | 64%                     | 2.089                    |
| Jessore                  | 76±81                   | 2.99±2.18               | 0.70±0.75              | 13                     | 32/61          | 52%                  | 11/61               | 18%                     | 2.441                    |
| Jhalakati                | 54±144                  | 1.93±2.30               | 5.00±2.75              | -356                   | 2/14           | 14%                  | 0/14                | 0%                      | 0.696                    |
| Jhenaidah                | 49±91                   | 2.82±2.66               | 0.36±0.27              | 46                     | 13/49          | 27%                  | 26/49               | 53%                     | 1.555                    |
| Khulna                   | 52±89                   | 2.82±3.19               | 1.40±1.60              | -45                    | 16/49          | 33%                  | 5/49                | 10%                     | 2.334                    |
| Kishoreganj              | 55±96                   | 2.68±3.42               | 0.94±1.12              | -9                     | 27/96          | 28%                  | 24/96               | 25%                     | 2.525                    |
| Kurigram                 | 21±57                   | 6.95±8.65               | 0.40±0.43              | 357                    | 7/76           | 9%                   | 48/76               | 63%                     | 1.782                    |
| Kushtia                  | 115±311                 | 2.66±2.94               | 0.39±0.44              | 17                     | 13/42          | 31%                  | 14/42               | 33%                     | 1.713                    |
| Lakshmipur **            | 323±279                 | 3.35±3.97               | 1.66±2.04              | -8                     | 13/16          | 81%                  | 1/16                | 6%                      | 1.479                    |
| Lalmonirhat              | 1±3                     | 2.61±4.37               | 0.19±0.35              | 1841                   | 0/39           | 0%                   | 23/39               | 59%                     | 1.089                    |
| Madaripur **             | 255±193                 | 4.10±3.49               | 2.03±2.36              | -13                    | 25/27          | 93%                  | 1/27                | 4%                      | 1.137                    |
| Magura                   | 25±53                   | 1.48±2.22               | 0.33±0.38              | 21                     | 4/29           | 14%                  | 6/29                | 21%                     | 0.811                    |
| Manikganj <sup>g</sup>   | 23±25                   | 4.71±4.56               | 0.70±0.59              | 140                    | 6/42           | 14%                  | 28/42               | 67%                     | 1.275                    |
| Maulvibazar <sup>g</sup> | 17±39                   | 7.36±7.06               | 0.56±0.61              | 445                    | 3/48           | 6%                   | 34/48               | 71%                     | 0.580                    |
| Meherpur                 | 115±145                 | 2.95±1.93               | 0.42±0.30              | 18                     | 8/13           | 62%                  | 3/13                | 23%                     | 1.604                    |
| Munshiganj *             | 198±146                 | 4.80±4.29               | 1.19±0.73              | 6                      | 37/43          | 86%                  | 9/43                | 21%                     | 1.294                    |
| Mymensingh               | 17±35                   | 1.41±3.19               | 0.28±0.33              | 41                     | 14/100         | 14%                  | 24/100              | 24%                     | 4.439                    |
| Naogaon                  | 6±30                    | 1.32±2.62               | 0.10±0.12              | 227                    | 2/92           | 2%                   | 54/92               | 59%                     | 2.377                    |
| Narail                   | 92±99                   | 3.65±4.56               | 1.01±0.88              | 5                      | 10/23          | 43%                  | 5/23                | 22%                     | 0.689                    |
| Narayanganj              | 52±97                   | 2.91±5.56               | 0.47±0.39              | 36                     | 7/28           | 25%                  | 7/28                | 25%                     | 2.138                    |
| Narsingdi                | 43±64                   | 1.98±3.08               | 0.43±0.65              | 18                     | 15/54          | 28%                  | 15/54               | 28%                     | 1.891                    |
| Natore                   | 1±3                     | 0.42±1.02               | 0.09±0.08              | 130                    | 0/51           | 0%                   | 11/51               | 22%                     | 1.521                    |
| Nawabganj                | 7±14                    | 0.96±1.58               | 0.14±0.19              | 100                    | 2/45           | 4%                   | 14/45               | 31%                     | 1.420                    |
| Netrokona                | 30±43                   | 3.05±4.40               | 0.67±0.77              | 39                     | 14/64          | 22%                  | 16/64               | 25%                     | 1.938                    |
| Nilphamari <sup>g</sup>  | 2±5                     | 3.05±4.63               | 0.14±0.22              | 1521                   | 0/47           | 0%                   | 34/47               | 72%                     | 1.551                    |
| Noakhali **              | 231±167                 | 1.36±1.60               | 1.81±2.12              | -26                    | 30/32          | 94%                  | 1/32                | 3%                      | 2.533                    |
| Pabna                    | 32±90                   | 2.26±4.30               | 0.23±0.32              | 63                     | 13/78          | 17%                  | 33/78               | 42%                     | 2.154                    |
| Panchagarh <sup>g</sup>  | 3±6                     | 2.54±6.50               | 0.17±0.36              | 1047                   | 0/39           | 0%                   | 27/39               | 69%                     | 0.829                    |
| Patuakhali               | 7±6                     | 5.02±0.49               | 2.35±2.33              | -473                   | 0/2            | 0%                   | 1/2                 | 50%                     | 0.507                    |
| Pirojpur                 | 42±74                   | 3.04±2.72               | 3.03±2.54              | -217                   | 8/33           | 24%                  | 2/33                | 6%                      | 1.444                    |
| Rajbari                  | 50±91                   | 3.35±4.78               | 0.32±0.40              | 62                     | 8/33           | 24%                  | 17/33               | 52%                     | 1.127                    |
| Rajshahi                 | 8±18                    | 0.73±1.57               | 0.15±0.20              | 43                     | 5/78           | 6%                   | 17/78               | 22%                     | 0.940                    |
| Rangpur                  | 8±33                    | 4.46±6.19               | 0.28±0.34              | 559                    | 1/83           | 1%                   | 44/83               | 53%                     | 2.262                    |
| Satkhira *               | 156±130                 | 4.80±2.79               | 1.30±0.78              | 5                      | 38/48          | 79%                  | 13/48               | 27%                     | 1.843                    |
| Shariatpur *             | 184±166                 | 4.40±3.48               | 1.58±1.38              | -5                     | 32/40          | 80%                  | 6/40                | 15%                     | 1.057                    |
| Sherpur                  | 23±36                   | 5.06±8.07               | 0.27±0.31              | 248                    | 6/50           | 12%                  | 30/50               | 60%                     | 1.247                    |
| Sirajganj                | 31±53                   | 7.69±8.63               | 0.58±0.47              | 254                    | 20/87          | 23%                  | 55/87               | 63%                     | 2.707                    |
| Sunamganj                | 41±62                   | 5.61±7.49               | 1.67±2.03              | 6                      | 2/13           | 15%                  | 6/13                | 46%                     | 1.969                    |
| Sylhet <sup>g</sup>      | 19±28                   | 10.52±11.5              | 1.40±1.45              | 419                    | 12/67          | 18%                  | 46/67               | 69%                     | 2.570                    |
| Tangail <sup>g</sup>     | 20±33                   | 5.20±5.31               | 0.48±0.45              | 240                    | 8/89           | 9%                   | 60/89               | 67%                     | 3.254                    |
| Thakurgaon               | 1±1                     | 1.01±1.74               | 0.13±0.17              | 844                    | 0/46           | 0%                   | 19/46               | 41%                     | 1.196                    |
| Over 200 **              | 301 ± 200               | 4.20 ± 3.80             | 1.88 ± 1.83            | -8                     | 154/163        | 94 %                 | 13/163              | 8 %                     | 10.17                    |
| Over 149 *               | 207 ± 183               | 4.28 ± 3.83             | 1.50 ± 1.48            | -4                     | 433/549        | 79 %                 | 90/549              | 16%                     | 14.35                    |
| > 90 m deep              | 5 ± 21                  | 1.12 ± 2.11             | 0.30 ± 0.46            | -                      | 1/81           | 1.2 %                | -                   | -                       | -                        |
| > 90 m deep              | 10 ± 33                 | 1.00 ± 2.38             | 0.32 ± 0.37            | -                      | 9/173          | 5.2 %                | -                   | -                       | -                        |

**Table S2.** Concentrations of As, Fe and P and relevant numbers for arsenic removal in all districts of Bangladesh. Calculated from the BGS-DPHE (2) database with wells from 10-90 m depth (2988 of 3534) with reported values for As, P and Fe (2984). Non-numerical entries with "< detection limit" were replaced with numerical values (detection limit/2). The districts are marked and color-coded as follows: **As>149 µg/L \***, **As>200 µg/L \*\***, **Arsenic removal possible for > 65% of wells**<sup>9</sup>. In each of the worst affected districts of Bhola, Chandpur, Gopalganj, Lakshimpur, Madaripur, and Noakhali (marked red), more than 80% of the wells are affected by [As] >50 µg/L, and less than 6% of the wells could be treated by passive removal or sand filters (except in Gopalganj where 24% could be treated. The criterion for treatment with natural iron is based on the numbers of Meng et al., who reported that after oxidation of As with NaOCl, Fe:As ratios of >40 (mgL<sup>-1</sup>/ mgL<sup>-1</sup>) or > 53.6 (M/M), added as FeCl<sub>3</sub>, are need to remove As to less than 50 µg/L (12). This criterion is in principal agreement with our laboratory and field study on passive removal with natural iron (13). In the red marked districts combined, the mean As-concentration is 301 µg/L, around 94 % of the wells have over >50 µg/L As and only about 8 % can be treated by precipitation with natural iron. In the orange (yellow in the maps) and red marked districts combined, the mean As-concentration is 207 µg/L and 79 % of the wells have >50 µg/L As and 16 % can be treated by passive removal. Over 24.5 million people live in these districts. As a comparison, the corresponding numbers from wells deeper than 90 m (92-362 m deep) in the marked districts are listed in the last two rows. (District populations from: <http://www.statoids.com/ybd.html> with 2001-01-23 census provisional data from Bangladesh Bureau of Statistics).

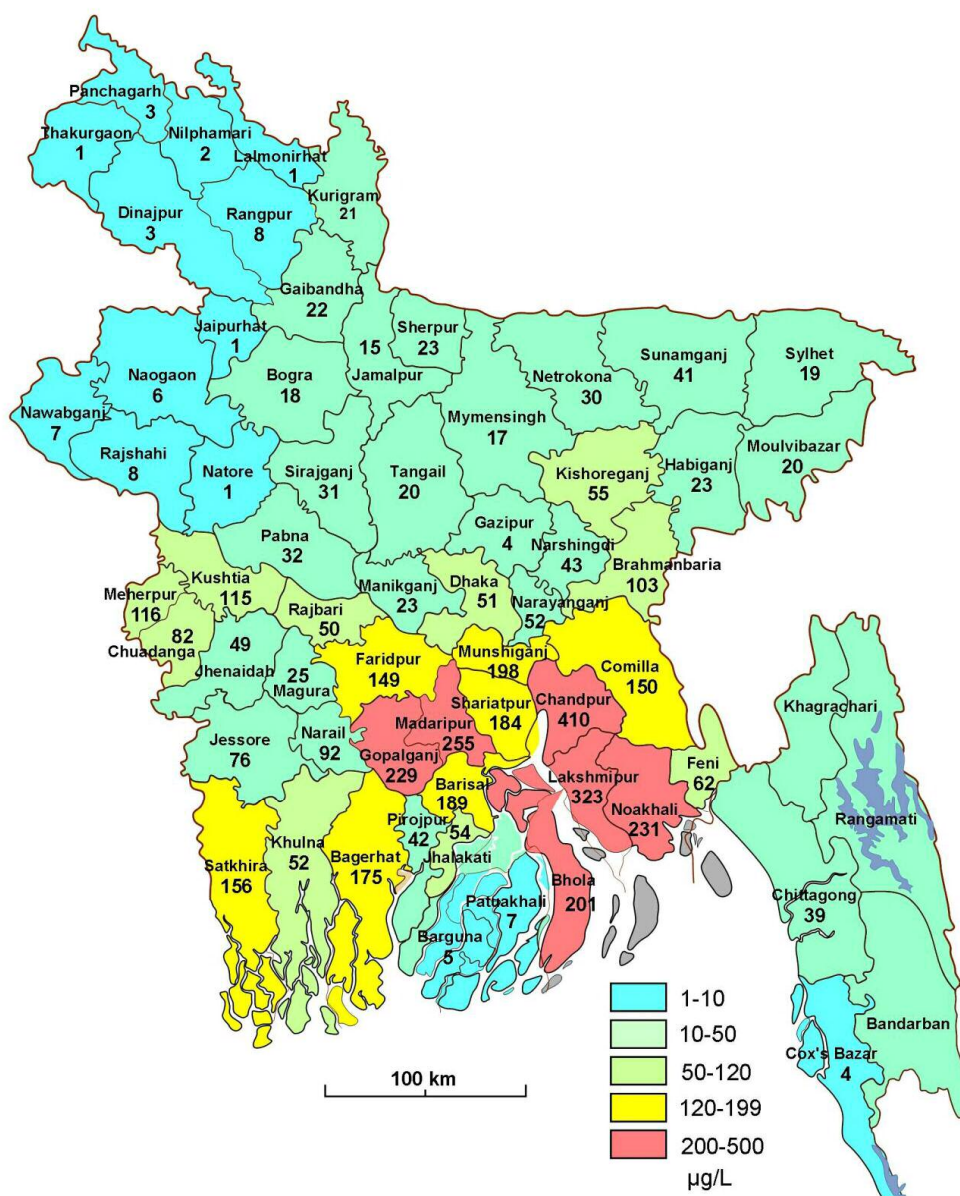

**Figure S1.** District map of Bangladesh with mean As-concentrations in 10-90 m deep tubewells, as explained in Table S2. Insufficient information was available in the regions marked grey.

## Literature Cited

- (S1) Yu, W. H.; Harvey, C. M.; Harvey, C. F. Arsenic in groundwater in Bangladesh: A geostatistical and epidemiological framework for evaluating health effects and potential remedies. *Water Resour. Res.* **2003**, 39, (6).
- (S2) Wasserman, G. A.; Liu, X. H.; Parvez, F.; Ahsan, H.; Factor-Litvak, P.; Kline, J.; Van Geen, A.; Slavkovich, V.; Lolacono, N. J.; Levy, D.; Cheng, Z. Q.; Graziano, J. H. Water arsenic exposure and intellectual function in 6-year-old children in Araihaazar, Bangladesh. *Environ. Health Perspect.* **2007**, 115, (2), 285-289.
